# Supplementary material for: Recent Advancements of Polyaniline/Metal Organic Framework (PANI/MOF) Composite Electrodes for Supercapacitor Applications: A Critical Review
Source: MDPI journal article supplement (doi:10.3390/nano12091511), 2022-04-29
Supplement: s1 [file s1]

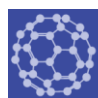

# Recent Advancements of Polyaniline/Metal Organic Framework (PANI/MOF) Composite Electrodes for Supercapacitor Applications: A Critical Review

Rajangam Vinodh <sup>1,†</sup>, Rajendran Suresh Babu <sup>2,†</sup>, Sangaraju Sambasivam <sup>3,†</sup>, Chandu V. V. Muralee Gopi <sup>4</sup>, Salem Alzahmi <sup>5,7,\*</sup>, Hee-Je Kim <sup>6,\*</sup>, Ana Lucia Ferreira de Barros <sup>2</sup> and Ihab M. Obaidat <sup>3,7,\*</sup>

**Table S1.** Specific energy and specific power of recently reported articles in supercapacitors.

| Electrode Material                                                   | Specific energy | Specific power | Ref.  |
|----------------------------------------------------------------------|-----------------|----------------|-------|
| NiAl-LDHs//AC                                                        | 21              | 700            | [114] |
| CoAl LDHCNTs//AC                                                     | 28              | 444.1          | [115] |
| NiO nanoflakes//AC                                                   | 52.4            | 32000          | [116] |
| Porous carbon derived from used baby diaper                          | 9.4             | 1542           | [117] |
| HCP of [P(DVB:PVC)] derived porous carbon                            | 39.47           | 699.96         | [6]   |
| P-Co <sub>0.21</sub> Ni <sub>0.79</sub> MoO <sub>4</sub> //AC        | 49.2            | 747.7          | [118] |
| VS <sub>2</sub> //AC                                                 | 42              | 700            | [119] |
| NiMoO <sub>4</sub> //AC                                              | 18              | 704            | [120] |
| Chitin-derived hierarchically porous carbon microspheres/polyaniline | 8.9             | 1644           | [121] |
| MnO <sub>2</sub> -graphene-chitosan composite                        | 80.40           | 2894.61        | [122] |

## References

- Kim, I.; Vinodh, R.; Gopi, C.V.V.M.; Kim, H.-J.; Babu, R.S.; Deviprasath, C.; Devendiran, M.; Kim, S. Novel porous carbon electrode derived from hypercross-linked polymer of poly(divinylbenzene-co-vinyl benzyl chloride) for supercapacitor applications. *J. Energy Storage* **2021**, *43*, 103287.
- Zhang, L.; Yao, H.; Li, Z.; Sun, P.; Liu, F.; Dong, C.; Wang, J.; Li, Z.; Wu, M.; Zhang, C.; et al. Synthesis of delaminated layered double hydroxides and their assembly with graphene oxide for supercapacitor application. *J. Alloys Compd.* **2017**, *711*, 31–41.
- Yu, L.; Shi, N.; Liu, Q.; Wang, J.; Yang, B.; Wang, B.; Yan, H.; Sun, Y.; Jing, X. Facile synthesis of exfoliated Co–Al LDH–carbon nanotube composites with high performance as supercapacitor electrodes. *Phys. Chem. Chem. Phys.* **2014**, *16*, 17936–17942, <https://doi.org/10.1039/c4cp02020k>.
- Vinodh, R.; Babu, R.S.; Atchudan, R.; Kim, H.-J.; Yi, M.; Samyn, L.M.; de Barros, A.L.F. Fabrication of High-Performance Asymmetric Supercapacitor Consists of Nickel Oxide and Activated Carbon (NiO//AC). *Catalysts* **2022**, *12*, 375, <https://doi.org/10.3390/catal12040375>.
- Atchudan, R.; Edison, T.N.J.I.; Perumal, S.; Thirukumaran, P.; Vinodh, R.; Lee, Y.R. Green synthesis of nitrogen-doped carbon nanograss for supercapacitors. *J. Taiwan Inst. Chem. Eng.* **2019**, *102*, 475–486, <https://doi.org/10.1016/j.jtice.2019.06.020>.
- Xing, T.; Ouyang, Y.; Chen, Y.; Zheng, L.; Wu, C.; Wang, X. P-doped ternary transition metal oxide as electrode material of asymmetric supercapacitor. *J. Energy Storage* **2020**, *28*, 101248, <https://doi.org/10.1016/j.est.2020.101248>.
- Masikhwa, T.M.; Barzegar, F.; Dangbegnon, J.K.; Bello, A.; Madito, M.J.; Momodu, D.; Manyala, N. Asymmetric supercapacitor based on VS<sub>2</sub> nanosheets and activated carbon materials. *RSC Adv.* **2016**, *6*, 38990–39000, <https://doi.org/10.1039/c5ra27155j>.
- Neeraj, N.S.; Mordina, B.; Srivastava, A.K.; Mukhopadhyay, K.; Prasad, N.E. Impact of process conditions on the electrochemical performances of NiMoO<sub>4</sub> nanorods and activated carbon based asymmetric supercapacitor. *Appl. Surf. Sci.*, **2019**, *473*, 807–819.
- Gao, L.; Xiong, L.; Xu, D.; Cai, J.; Huang, L.; Zhou, J.; Zhang, L. Distinctive Construction of Chitin-Derived Hierarchically Porous Carbon Microspheres/Polyaniline for High-Rate Supercapacitors. *ACS Appl. Mater. Interfaces* **2018**, *10*, 28918–28927.
- Salleh, N.A.; Kheawhom, S.; Mohamad, A.A. Chitosan as biopolymer binder for graphene in supercapacitor electrode. *Results Phys.* **2021**, *25*, 104244.
